# Supplementary material for: Resistance of Escherichia coli in Turkeys after Therapeutic or Environmental Exposition with Enrofloxacin Depending on Flooring
Source: MDPI journal article supplement (doi:10.3390/ijerph15091993), 2018-09-13
Supplement: s1 [file s1]

# Supplementary Materials:

**Table S1a.** Means of enrofloxacin- resistant *E. coli* isolates from cloacal swab and manure samples from turkeys.

| Time of sample collection* |    | Enrofloxacin         |                     |                     |                     |                     |                     |
|----------------------------|----|----------------------|---------------------|---------------------|---------------------|---------------------|---------------------|
|                            |    | cloacal swabs (n=24) |                     |                     | manure (n=6)        |                     |                     |
|                            |    | BT                   | AT                  | ET                  | BT                  | AT                  | ET                  |
| T1                         | G1 | 1.42 <sup>A,b</sup>  | 1.83 <sup>A,a</sup> | 2.00 <sup>A,a</sup> | 1.33 <sup>A,a</sup> | 1.33 <sup>B,a</sup> | 1.33 <sup>B,a</sup> |
|                            | G2 | 1.42 <sup>A,b</sup>  | 2.00 <sup>A,a</sup> | 2.04 <sup>A,a</sup> | 2.00 <sup>A,a</sup> | 2.00 <sup>A,a</sup> | 2.67 <sup>A,a</sup> |
|                            | G3 | 1.42 <sup>A,b</sup>  | 1.92 <sup>A,a</sup> | 2.46 <sup>A,a</sup> | 1.67 <sup>A,a</sup> | 2.33 <sup>A,a</sup> | 1.33 <sup>B,a</sup> |
|                            | G4 | 1.42 <sup>A,b</sup>  | 2.17 <sup>A,a</sup> | 2.29 <sup>A,a</sup> | 2.00 <sup>A,a</sup> | 2.33 <sup>A,a</sup> | 1.33 <sup>B,a</sup> |
| T2                         | G1 | 1.00 <sup>A,b</sup>  | 3.00 <sup>A,a</sup> | 2.96 <sup>A,a</sup> | 1.00 <sup>A,b</sup> | 2.17 <sup>A,a</sup> | 2.83 <sup>A,a</sup> |
|                            | G2 | 1.00 <sup>A,b</sup>  | 3.00 <sup>A,a</sup> | 3.00 <sup>A,a</sup> | 1.00 <sup>A,b</sup> | 2.67 <sup>A,a</sup> | 2.83 <sup>A,a</sup> |
|                            | G3 | 1.00 <sup>A,c</sup>  | 2.58 <sup>B,b</sup> | 3.00 <sup>A,a</sup> | 1.00 <sup>A,b</sup> | 2.67 <sup>A,a</sup> | 3.00 <sup>A,a</sup> |
|                            | G4 | 1.00 <sup>A,b</sup>  | 3.00 <sup>A,a</sup> | 3.00 <sup>A,a</sup> | 1.00 <sup>A,b</sup> | 3.00 <sup>A,a</sup> | 3.00 <sup>A,a</sup> |
| T3                         | G1 | 1.00 <sup>A,a</sup>  | 1.00 <sup>A,a</sup> | 1.00 <sup>B,a</sup> | 1.00 <sup>A,a</sup> | 1.00 <sup>A,a</sup> | 1.00 <sup>A,a</sup> |
|                            | G2 | 1.00 <sup>A,a</sup>  | 1.00 <sup>A,a</sup> | 1.00 <sup>A,a</sup> | 1.00 <sup>A,a</sup> | 1.00 <sup>A,a</sup> | 1.00 <sup>A,a</sup> |
|                            | G3 | 1.00 <sup>A,a</sup>  | 1.00 <sup>A,a</sup> | 1.00 <sup>B,a</sup> | 1.00 <sup>A,a</sup> | 1.00 <sup>A,a</sup> | 1.00 <sup>A,a</sup> |
|                            | G4 | 1.00 <sup>A,a</sup>  | 1.00 <sup>A,a</sup> | 1.00 <sup>B,a</sup> | 1.00 <sup>A,a</sup> | 1.17 <sup>A,a</sup> | 1.00 <sup>A,a</sup> |

<sup>a, b, c</sup> means in the same row differ significantly between sampling days at group level ( $p < 0.05$ );

<sup>A, B</sup> means in the same column differ significantly between groups on level of sampling day ( $p < 0.05$ );

\*BT = before treatment; AT = after treatment; ET = end of trial;

T1 = untreated antibiotic trial, T2 = treated antibiotic trial, T3 = trial with simulated water spillage containing antibiotic.

G1 = entire floor pen covered with litter; G2 = floor pen covered with litter and having floor heating; G3 = partially (50:50) slatted flooring including an area that was littered; G4 = fully slatted flooring with a sand bath (900 cm<sup>2</sup>).

**Table S1b.** Means of ampicillin-resistant *E. coli* isolates from cloacal swab and manure samples from turkeys.

| Time of sample collection* |    | Ampicillin          |                      |                      |                     |                     |                      |
|----------------------------|----|---------------------|----------------------|----------------------|---------------------|---------------------|----------------------|
|                            |    | cloacal swab (n=24) |                      |                      | manure (n=6)        |                     |                      |
|                            |    | BT                  | AT                   | ET                   | BT                  | AT                  | ET                   |
| T1                         | G1 | 1.33 <sup>A,b</sup> | 2.08 <sup>A,a</sup>  | 1.50 <sup>A,b</sup>  | 1.33 <sup>A,b</sup> | 2.33 <sup>A,a</sup> | 1.00 <sup>A,b</sup>  |
|                            | G2 | 1.33 <sup>A,a</sup> | 1.75 <sup>AB,a</sup> | 1.75 <sup>A,a</sup>  | 1.33 <sup>A,a</sup> | 1.00 <sup>B,a</sup> | 1.00 <sup>A,a</sup>  |
|                            | G3 | 1.33 <sup>A,a</sup> | 1.50 <sup>B,a</sup>  | 1.33 <sup>A,a</sup>  | 1.33 <sup>A,a</sup> | 1.00 <sup>B,a</sup> | 1.00 <sup>A,a</sup>  |
|                            | G4 | 1.33 <sup>A,a</sup> | 1.88 <sup>AB,a</sup> | 1.50 <sup>A,a</sup>  | 1.67 <sup>A,a</sup> | 1.00 <sup>B,a</sup> | 1.00 <sup>A,a</sup>  |
| T2                         | G1 | 1.00 <sup>A,b</sup> | 1.92 <sup>A,a</sup>  | 2.08 <sup>AB,a</sup> | 1.00 <sup>A,a</sup> | 1.67 <sup>A,a</sup> | 1.67 <sup>A,a</sup>  |
|                            | G2 | 1.00 <sup>A,b</sup> | 1.17 <sup>B,b</sup>  | 2.25 <sup>A,a</sup>  | 1.00 <sup>A,b</sup> | 2.33 <sup>A,a</sup> | 1.67 <sup>A,ab</sup> |
|                            | G3 | 1.00 <sup>A,b</sup> | 1.08 <sup>B,b</sup>  | 2.08 <sup>AB,a</sup> | 1.00 <sup>A,b</sup> | 2.50 <sup>A,a</sup> | 2.00 <sup>A,a</sup>  |
|                            | G4 | 1.00 <sup>A,b</sup> | 1.08 <sup>B,b</sup>  | 1.58 <sup>B,a</sup>  | 1.00 <sup>A,b</sup> | 2.00 <sup>A,a</sup> | 1.33 <sup>A,ab</sup> |
| T3                         | G1 | 1.00 <sup>A,c</sup> | 2.5 <sup>A,a</sup>   | 1.50 <sup>A,b</sup>  | 1.00 <sup>A,a</sup> | 1.33 <sup>A,a</sup> | 1.67 <sup>A,a</sup>  |
|                            | G2 | 1.00 <sup>A,b</sup> | 1.92 <sup>B,a</sup>  | 1.75 <sup>A,a</sup>  | 1.00 <sup>A,b</sup> | 1.00 <sup>A,b</sup> | 2.33 <sup>A,a</sup>  |
|                            | G3 | 1.00 <sup>A,b</sup> | 1.92 <sup>B,a</sup>  | 1.75 <sup>A,a</sup>  | 1.33 <sup>A,a</sup> | 1.00 <sup>A,a</sup> | 1.67 <sup>A,a</sup>  |
|                            | G4 | 1.00 <sup>A,b</sup> | 2.00 <sup>AB,a</sup> | 1.92 <sup>A,a</sup>  | 1.67 <sup>A,a</sup> | 1.33 <sup>A,a</sup> | 1.67 <sup>A,a</sup>  |

<sup>a, b, c</sup> means in the same row differ significantly between sampling days at group level ( $p < 0.05$ );

<sup>A, B</sup> means in the same column differ significantly between groups on level of sampling day ( $p < 0.05$ );

\*BT = before treatment; AT = after treatment; ET = end of trial;

T1 = untreated antibiotic trial, T2 = treated antibiotic trial, T3 = trial with simulated water spillage containing antibiotic.

G1 = entire floor pen covered with litter; G2 = floor pen covered with litter and having floor heating; G3 = partially (50:50) slatted flooring including an area that was littered; G4 = fully slatted flooring with a sand bath (900 cm<sup>2</sup>).
